# Supplementary material for: Plasma-assisted synthesis of hierarchical defect N-doped iron–cobalt sulfide@Co foam as an efficient bifunctional electrocatalyst for overall water splitting
Source: Royal Society of Chemistry journal article supplement (doi:10.1039/d3nj00675a), 2023-01-01
Supplement: d3nj00675a1.pdf [file d3nj00675a1.pdf]

## Supporting information

Plasma-Assisted Synthesis of Hierarchical Defect N-doped iron-cobalt sulfide@Co Foam as Efficient Bifunctional Electrocatalysts for Overall Water Splitting

Xiangyu Zhang <sup>a</sup>, Kai Zhao<sup>b</sup>, Hong Li <sup>a</sup>, Yanhui Li <sup>a</sup>, Wenrong Yang<sup>c</sup>, Jingquan Liu <sup>b\*</sup> and Da Li <sup>a\*</sup> 

<sup>a</sup> College of Mechanical and Electrical Engineering, Qingdao University, Qingdao 266071, China

<sup>b</sup> College of Materials Science and Engineering, Qingdao University, Qingdao 266071, China

<sup>c</sup> School of Life and Environmental Science, Centre for Chemistry and Biotechnology, Deakin University, Victoria, 3217, Australia

### Corresponding Author

Email: [d.li@qdu.edu.cn](mailto:d.li@qdu.edu.cn)

[jliu@qdu.edu.cn](mailto:jliu@qdu.edu.cn)

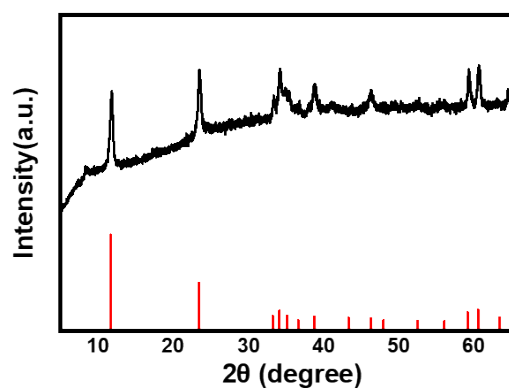

**Fig. S1** XRD pattern of CoFeLDH and Standard diffraction pattern PDF#50-0235

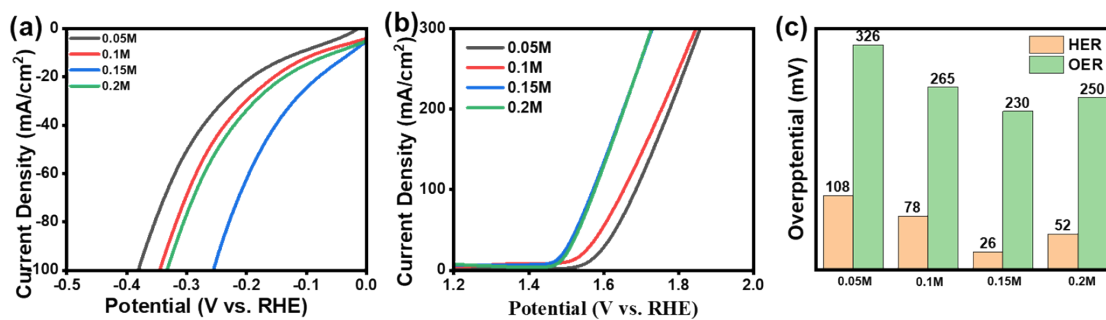

**Fig. S2** The LSV curves for HER (a) and OER (b) of samples with different solution concentrations used for ion exchange, and (c) the overpotential for HER and OER at 10 mA/cm<sup>2</sup>.

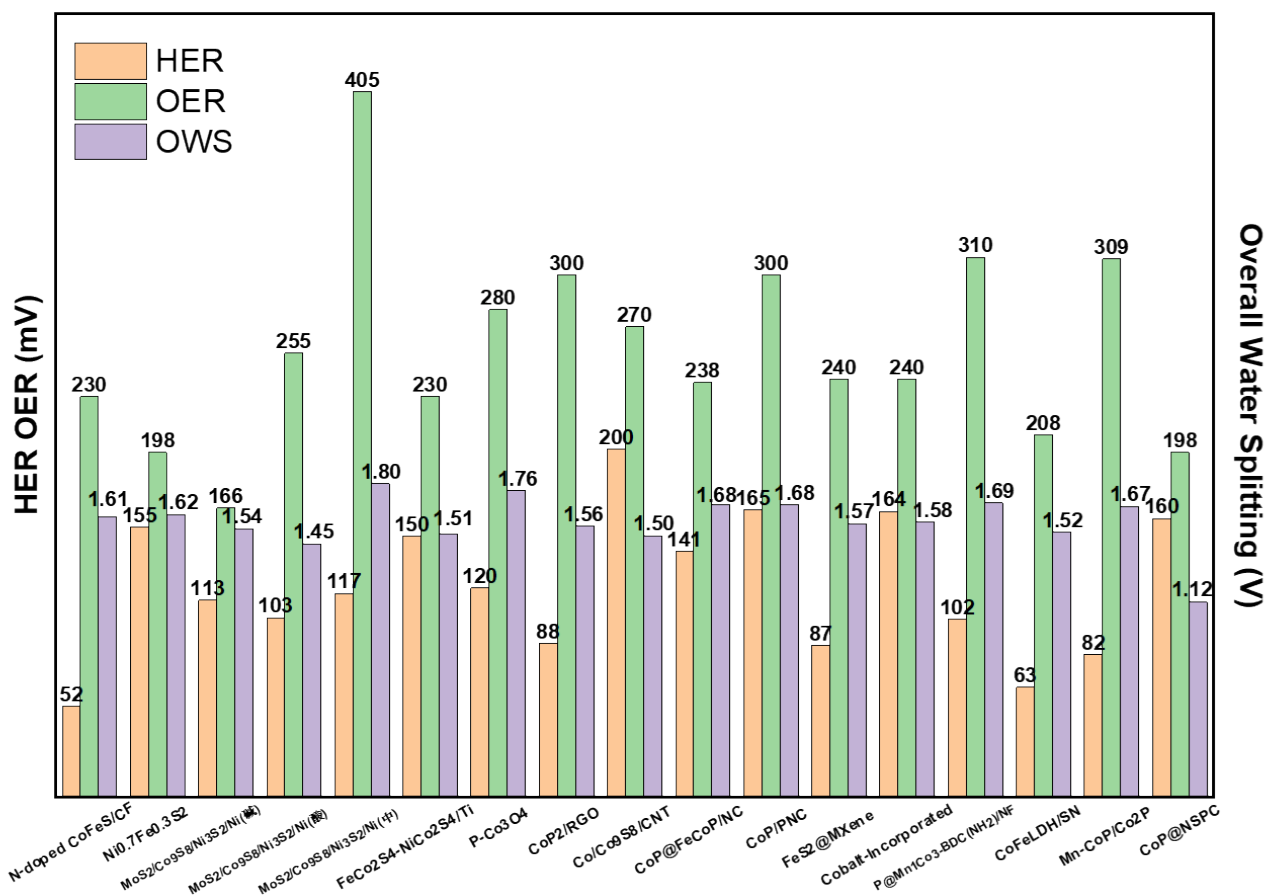

Fig. S3 Comparison of the performance of N-doped CF with those of other catalysts for water splitting

**Table S1.** Comparison of the performance of N-doped CF with that of other catalysts for water splitting

| Material                                                                                 | Electrolytle                        | Reaction/J (mA cm <sup>-2</sup> ) | Potential                 | Ref |
|------------------------------------------------------------------------------------------|-------------------------------------|-----------------------------------|---------------------------|-----|
| Ni-Fe-O nanowire network                                                                 | 1M KOH                              | HER/10; OER/10; OWS /10           | /;244mV;1.64V             | 1   |
| CuCo Hybrid Oxides                                                                       | 1M KOH                              | HER/10; OER/327; OWS/10           | 140mV;370mV;1.61V         | 2   |
| Mo-Ni <sub>3</sub> S <sub>2</sub> /Ni <sub>x</sub> P <sub>y</sub> /NF                    | 1M KOH                              | HER/10; OER/50; OWS/10            | 109mV;238mV;1.46V         | 3   |
| NiFeRu-LDH                                                                               | 1M KOH                              | HER/10; OER/10; OWS/10            | 29mV;225mV;1.52V          | 4   |
| MoO <sub>2</sub> Nanosheets                                                              | 1M KOH                              | HER/10; OER/10; OWS/10            | 27mV;260mV;1.53V          | 5   |
| Ni/NiP                                                                                   | 1M KOH                              | HER/10; OER/30; OWS/10            | 130mV;270mV;1.63V         | 6   |
| N-WC nanoarray                                                                           | 0.5M H <sub>2</sub> SO <sub>4</sub> | HER/10; OER/60; OWS/30            | 113mV;470mV;1.7V          | 7   |
| Ni <sub>3</sub> FeN Nanoparticles                                                        | 1M KOH                              | HER/10; OER/10; /                 | 158mV;280mV;/             | 8   |
| Ni <sub>0.7</sub> Fe <sub>0.3</sub> S <sub>2</sub> microflower                           | 1M KOH                              | HER/10; OER/10; OWS/10            | 155mV;198mV;1.625V        | 9   |
| CoS <sub>x</sub> /Ni <sub>3</sub> S <sub>2</sub> @NF                                     | 1M KOH                              | HER/10; OER/20; OWS/10            | 204mV;280mV;1.573V        | 10  |
| MoS <sub>2</sub> /Co <sub>9</sub> S <sub>8</sub> /Ni <sub>3</sub> S <sub>2</sub> /Ni     | 1M KOH                              | HER/10; OER/10; OWS/10            | 113mV;166mV;1.54V         |     |
|                                                                                          | 0.5M H <sub>2</sub> SO <sub>4</sub> | HER/10; OER/10; OWS/10            | 103mV;255mV;1.45V         | 11  |
|                                                                                          | 1M PBS, (pH=7)                      | HER/10; OER/10; OWS/10            | 117mV;405mV;1.8V          |     |
| FeCo <sub>2</sub> S <sub>4</sub> -NiCo <sub>2</sub> S <sub>4</sub> /Ti mnanosheet arrays | 1M KOH                              | HER/10; OER/10; OWS/10            | 150mV;230mV;1.51V         | 12  |
| P-Co <sub>3</sub> O <sub>4</sub>                                                         | 1M KOH                              | HER/10; OER/10; OWS/50            | 120mV;280mV;1.76V         | 13  |
| NiCo <sub>2</sub> O <sub>4</sub> NA/CC                                                   | 1M KOH                              | HER/100; OER/100; OWS/10          | 305mV;340mV;1.68V         | 14  |
| CoP <sub>2</sub> /RGO                                                                    | 1M KOH                              | HER/10; OER/10; OWS/10            | 88mV;300mV;1.56V          | 15  |
| Co/Co <sub>9</sub> S <sub>8</sub> /CNT                                                   | 1M KOH                              | HER/10; OER/10; OWS/10            | 200mV;270mV;1.5V          | 16  |
| Fe <sub>3</sub> S <sub>4</sub> -Fe <sub>7</sub> Se <sub>8</sub> @C iron pyrite           | 1M KOH                              | HER/10; OER/20; OWS/10            | 124mV;219mV;1.67V         | 17  |
|                                                                                          | 1M KOH                              | HER/10; OER/100; OWS/10           | 150mV;326mV;1.567V        | 18  |
| CoP@FeCoP/NC                                                                             | 1M KOH                              | HER/10; OER/10; OWS/10            | 141mV;238mV;1.68V         | 19  |
| CoP/PNC                                                                                  | 1M KOH                              | HER/10; OER/10; OWS/10            | 165mV;300mV;1.68V         | 20  |
| FeS <sub>2</sub> @MXene                                                                  | 1M KOH                              | HER/10; OER/10; OWS/10            | 87mV;240mV;1.57V          | 21  |
| Cobalt-Incorporated Copper Sulfide/NF                                                    | 1M KOH                              | HER/10; OER/10; OWS/10            | 164mV;240mV;1.58V         | 22  |
| Vs-Co <sub>3</sub> S <sub>4</sub> @NF                                                    | 1M KOH                              | HER/10; OER/100; OWS/20           | 45mV;245mV;1.53V          | 23  |
| Cu <sub>x</sub> O@NiO-MoO <sub>2</sub> NRs                                               | 1M KOH                              | HER/10; OER/50; OWS/10            | 65mV;321mV;1.54V          | 24  |
| P@Mn <sub>1</sub> Co <sub>3</sub> -BDC(NH <sub>2</sub> )/NF                              | 1M KOH                              | HER/10; OER/10; OWS/10            | 102mV;310mV;1.69V         | 25  |
| CuCo <sub>2</sub> O <sub>4</sub> /CoOOH                                                  | 1M KOH                              | HER/10; OER/20; OWS/10            | 125mV;217mV;1.583V        | 26  |
| CoFeLDH/SN                                                                               | 1M KOH                              | HER/10; OER/10; OWS/10            | 63mV;208mV;1.52V          | 27  |
| HEA/JMPA-NPs                                                                             | 1M KOH                              | HER/10; OER/20; OWS/100           | 85mV;314mV;1.75V          | 28  |
| FMO/NF                                                                                   | 1M KOH                              | HER/100; OER/100; OWS/100         | 263mV;278mV;1.87V         | 29  |
| Mn-CoP/Co <sub>2</sub> P                                                                 | 1M KOH                              | HER/10; OER/10; OWS/10            | 82mV;309mV;1.67V          | 30  |
| NiCoVO <sub>x</sub> @NF                                                                  | 1M KOH                              | HER/10; OER/50; OWS/10            | 107mV;217mV;1.56V         | 31  |
| CoP@NSPC                                                                                 | 1M KOH                              | HER/10; OER/10; OWS/10            | 160mV;198mV;1.125V        | 32  |
| NiCo <sub>2</sub> S <sub>4</sub> @NiMoO <sub>4</sub> /NF                                 | 1M KOH                              | HER/100; OER/100; OWS/10          | 197mV;285mV;1.46V         | 33  |
| <b>N-doped CoFeS/CF</b>                                                                  | <b>1M KOH</b>                       | <b>HER/10; OER/10; OWS/10</b>     | <b>160mV;198mV;1.125V</b> |     |

## References

1. Dong, C.; Kou, T.; Gao, H.; Peng, Z.; Zhang, Z., Eutectic-Derived Mesoporous Ni-Fe-O Nanowire Network Catalyzing Oxygen Evolution and Overall Water Splitting. *Advanced Energy Materials* **2018**, *8* (5).
2. Kuang, M.; Han, P.; Wang, Q.; Li, J.; Zheng, G., CuCo Hybrid Oxides as Bifunctional Electrocatalyst for Efficient Water Splitting. *Advanced Functional Materials* **2016**, *26* (46), 8555-8561.
3. Luo, X.; Ji, P.; Wang, P.; Cheng, R.; Chen, D.; Lin, C.; Zhang, J.; He, J.; Shi, Z.; Li, N.; Xiao, S.; Mu, S., Interface Engineering of Hierarchical Branched Mo-Doped Ni<sub>3</sub>S<sub>2</sub>/Ni<sub>x</sub>Py Hollow Heterostructure Nanorods for Efficient Overall Water Splitting. *Advanced Energy Materials* **2020**, *10* (17).
4. Chen, G.; Wang, T.; Zhang, J.; Liu, P.; Sun, H.; Zhuang, X.; Chen, M.; Feng, X., Accelerated Hydrogen Evolution Kinetics on NiFe-Layered Double Hydroxide Electrocatalysts by Tailoring Water Dissociation Active Sites. *Adv Mater* **2018**, *30* (10).
5. Jin, Y.; Wang, H.; Li, J.; Yue, X.; Han, Y.; Shen, P. K.; Cui, Y., Porous MoO<sub>2</sub> Nanosheets as Non-noble Bifunctional Electrocatalysts for Overall Water Splitting. *Adv Mater* **2016**, *28* (19), 3785-90.
6. Chen, G. F.; Ma, T. Y.; Liu, Z. Q.; Li, N.; Su, Y. Z.; Davey, K.; Qiao, S. Z., Efficient and Stable Bifunctional Electrocatalysts Ni/Ni<sub>x</sub>My (M = P, S) for Overall Water Splitting. *Advanced Functional Materials* **2016**, *26* (19), 3314-3323.
7. Han, N.; Yang, K. R.; Lu, Z.; Li, Y.; Xu, W.; Gao, T.; Cai, Z.; Zhang, Y.; Batista, V. S.; Liu, W.; Sun, X., Nitrogen-doped tungsten carbide nanoarray as an efficient bifunctional electrocatalyst for water splitting in acid. *Nat Commun* **2018**, *9* (1), 924.
8. Jia, X.; Zhao, Y.; Chen, G.; Shang, L.; Shi, R.; Kang, X.; Waterhouse, G. I. N.; Wu, L.-Z.; Tung, C.-H.; Zhang, T., Ni<sub>3</sub>FeN Nanoparticles Derived from Ultrathin NiFe-Layered Double Hydroxide Nanosheets: An Efficient Overall Water Splitting Electrocatalyst. *Advanced Energy Materials* **2016**, *6* (10).
9. Yu, J.; Cheng, G.; Luo, W., Ternary nickel-iron sulfide microflowers as a robust electrocatalyst for bifunctional water splitting. *Journal of Materials Chemistry A* **2017**, *5* (30), 15838-15844.
10. Shit, S.; Chhetri, S.; Jang, W.; Murmu, N. C.; Koo, H.; Samanta, P.; Kuila, T., Cobalt Sulfide/Nickel Sulfide Heterostructure Directly Grown on Nickel Foam: An Efficient and Durable Electrocatalyst for Overall Water Splitting Application. *ACS Appl Mater Interfaces* **2018**, *10* (33), 27712-27722.
11. Yang, Y.; Yao, H.; Yu, Z.; Islam, S. M.; He, H.; Yuan, M.; Yue, Y.; Xu, K.; Hao, W.; Sun, G.; Li, H.; Ma, S.; Zapol, P.; Kanatzidis, M. G., Hierarchical Nanoassembly of MoS<sub>2</sub>/Co<sub>9</sub>S<sub>8</sub>/Ni<sub>3</sub>S<sub>2</sub>/Ni as a Highly Efficient Electrocatalyst for Overall Water Splitting in a Wide pH Range. *J Am Chem Soc* **2019**, *141* (26), 10417-10430.
12. Li, D.; Liu, Z.; Wang, J.; Liu, B.; Qin, Y.; Yang, W.; Liu, J., Hierarchical trimetallic sulfide FeCo<sub>2</sub>S<sub>4</sub>-NiCo<sub>2</sub>S<sub>4</sub> nanosheet arrays supported on a Ti mesh: An efficient 3D bifunctional electrocatalyst for full water splitting. *Electrochimica Acta* **2020**, *340*.
13. Xiao, Z.; Wang, Y.; Huang, Y.-C.; Wei, Z.; Dong, C.-L.; Ma, J.; Shen, S.; Li, Y.; Wang, S., Filling the oxygen vacancies in Co<sub>3</sub>O<sub>4</sub> with phosphorus: an ultra-efficient electrocatalyst for overall water splitting. *Energy & Environmental Science* **2017**, *10* (12), 2563-2569.
14. Liu, D.; Lu, Q.; Luo, Y.; Sun, X.; Asiri, A. M., NiCo<sub>2</sub>S<sub>4</sub> nanowires array as an efficient bifunctional electrocatalyst for full water splitting with superior activity. *Nanoscale* **2015**, *7* (37), 15122-6.
15. Wang, J.; Yang, W.; Liu, J., CoP<sub>2</sub> nanoparticles on reduced graphene oxide sheets as a super-efficient bifunctional electrocatalyst for full water splitting. *Journal of Materials Chemistry A* **2016**, *4* (13), 4686-4690.
16. Ashok, A.; Kumar, A.; Ponraj, J.; Mansour, S. A., Development of Co/Co<sub>9</sub>S<sub>8</sub> metallic nanowire anchored on N-doped CNTs through the pyrolysis of melamine for overall water splitting. *Electrochimica Acta* **2021**, *368*.
17. Le, T.-T.; Huang, S.; Ning, P.; Wang, W.; Wang, Q.; Jiang, Y.; He, Q.; Feng, J.; Hu, Z.; Chen, Z., Carbon-Decorated Fe<sub>3</sub>S<sub>4</sub>-Fe<sub>7</sub>Se<sub>8</sub> Hetero-Nanowires: Interfacial Engineering for Bifunctional Electrocatalysis Toward Hydrogen and Oxygen Evolution Reactions. *Journal of The Electrochemical Society* **2020**, *167* (8).
18. Shit, S.; Samanta, P.; Bolar, S.; Murmu, N. C.; Khanra, P.; Kuila, T., Synthesis of iron pyrite with efficient bifunctional electrocatalytic activity towards overall water splitting in alkaline medium. *Bulletin of Materials Science* **2021**, *44* (3).
19. Shi, J.; Qiu, F.; Yuan, W.; Guo, M.; Lu, Z.-H., Nitrogen-doped carbon-decorated yolk-shell CoP@FeCoP micro-polyhedra derived from MOF for efficient overall water splitting. *Chemical Engineering*

*Journal* **2021**, 403.

20. Peng, Z.; Yu, Y.; Jiang, D.; Wu, Y.; Xia, B. Y.; Dong, Z., N-doped carbon shell coated CoP nanocrystals encapsulated in porous N-doped carbon substrate as efficient electrocatalyst of water splitting. *Carbon* **2019**, 144, 464-471.
21. Xie, Y.; Yu, H.; Deng, L.; Amin, R. S.; Yu, D.; Fetohi, A. E.; Maximov, M. Y.; Li, L.; El-Khatib, K. M.; Peng, S., Anchoring stable FeS<sub>2</sub> nanoparticles on MXene nanosheets via interface engineering for efficient water splitting. *Inorganic Chemistry Frontiers* **2022**, 9 (4), 662-669.
22. Manivelan, N.; Karuppanan, S.; Prabakar, K., Djurleite Copper Sulfide-Coupled Cobalt Sulfide Interface for a Stable and Efficient Electrocatalyst. *ACS Appl Mater Interfaces* **2022**, 14 (27), 30812-30823.
23. Wang, Q.; Xu, H.; Qian, X.; He, G.; Chen, H., Sulfur vacancies engineered self-supported Co<sub>3</sub>S<sub>4</sub> nanoflowers as an efficient bifunctional catalyst for electrochemical water splitting. *Applied Catalysis B: Environmental* **2023**, 322.
24. Yang, J.; Xuan, H.; Yang, J.; Liang, X.; Li, Y.; Yang, J.; Han, P., Bimetallic NiMo oxides coupled with 3D Cu<sub>2</sub>O nanorods for efficient overall water splitting. *Journal of Alloys and Compounds* **2023**, 934.
25. Tian, R.; Wang, F.; Zou, C.; Pei, Z.; Guo, X.; Yang, H., Modulating organic ligands to construct 2D-3D-hybrid porous P-doped metal-organic frameworks electrocatalyst for overall water splitting. *Journal of Alloys and Compounds* **2023**, 933.
26. Wang, C.; Jiu, H.; Zhang, L.; Song, W.; Zhang, Y.; Wei, H.; Xu, Q.; Che, S.; Guo, Z.; Qin, Y., Bifunctional CuCo<sub>2</sub>O<sub>4</sub>/CoOOH as a synergistic catalyst supported on nickel foam for alkaline overall water splitting. *Journal of Alloys and Compounds* **2022**, 929.
27. Zhang, J.; Wei, A.; Liu, J.; Zhu, J.; He, Y.; Liu, Z., 3D self-supporting nickel sponge substrate derived CoFeLDH/SN as an efficient bifunctional electrocatalyst for overall water splitting. *Journal of Alloys and Compounds* **2022**, 927.
28. Luo, W.; Wang, Y.; Luo, L.; Gong, S.; Li, Y.; Gan, X., Constructing a bifunctional catalyst with both high entropy alloy nanoparticles and Janus multi-principal alloy nanoparticles for high-performance overall water splitting. *Appl Surf Sci* **2022**, 606.
29. Sun, A.; Qiu, Y.; Zheng, X.; Cui, L.; Liu, J., Construction of micro-nano hierarchical wing-like iron/molybdenum oxide heterojunction with synergistic effect for accelerated overall water splitting. *J Colloid Interface Sci* **2023**, 632 (Pt A), 108-116.
30. Tang, F.; Zhao, Y. W.; Ge, Y.; Sun, Y. G.; Zhang, Y.; Yang, X. L.; Cao, A. M.; Qiu, J. H.; Lin, X. J., Synergistic effect of Mn doping and hollow structure boosting Mn-CoP/Co(2)P nanotubes as efficient bifunctional electrocatalyst for overall water splitting. *J Colloid Interface Sci* **2022**, 628 (Pt B), 524-533.
31. Li, Q.; Zhang, X.; Shen, J.; Ji, X.; Liu, J., Bifunctional keel flower-like Ni-Co-V multicomponent oxide catalyst with enhanced electron transport for accelerating overall water splitting. *J Colloid Interface Sci* **2022**, 628 (Pt B), 467-476.
32. Wang, Q.; Yu, R.; Shen, D.; Liu, Q.; Hong Luo, K.; Wu, C.; Gu, S., Performance of intrinsic heteroatoms in cobalt phosphide loaded ginkgo leaf-based carbon material on promoting the electrocatalytic activity during hydrogen evolution reaction and oxygen evolution reaction. *Fuel* **2023**, 333.
33. Pan, Z.; Tang, Z.; Sun, D.; Zhan, Y., Hierarchical NiCo<sub>2</sub>S<sub>4</sub>@NiMoO<sub>4</sub> nanotube arrays on nickel foam as an advanced bifunctional electrocatalyst for efficient overall water splitting. *Electrochimica Acta* **2022**, 436.
